# Supplementary material
Source: ML conference proceedings conference paper supplement (https://openaccess.thecvf.com/content/CVPR_2019/html/Grigorev_Coordinate-Based_Texture_Inpainting_CVPR_2019_paper.html)
Supplement: Supplementary file 1 [file Grigorev_Coordinate-Based_Texture_Inpainting_CVPR_2019_supplemental.pdf]

Archive with 2 entries (2 files):
- 5430-supp.pdf
- video.mp4
