# Supplementary material
Source: ML conference proceedings conference paper supplement (https://openaccess.thecvf.com/content/CVPR_2019/html/Grigorev_Coordinate-Based_Texture_Inpainting_CVPR_2019_paper.html)
Supplement: Supplementary file 1 [file Grigorev_Coordinate-Based_Texture_Inpainting_CVPR_2019_supplemental.pdf › 5430-supp.pdf]

## Supplementary Material

### Coordinate-based Texture Inpainting for Pose-Guided Image Generation

Artur Grigorev<sup>1,2</sup>

Artem Sevastopolsky<sup>1,2</sup>

Alexander Vakhitov<sup>1</sup>

Victor Lempitsky<sup>1,2</sup>

<sup>1</sup> Samsung AI Center, Moscow, Russia

<sup>2</sup> Skolkovo Institute of Science and Technology (Skoltech), Moscow, Russia

{a.grigorev, a.sevastopol, a.vakhitov, v.lempitsky}@samsung.com

## 1. Full body resynthesis

### 1.1. Architectures

In this subsection we describe architectures used for resynthesis of full body onto a new pose in detail. Our pipeline consists of 3 networks: the inpainting network  $f(C, C'; \phi)$ , the refinement network  $g(S, M_S, M_N, W, E)$  and patch discriminator  $p(N, M_N)$ . During a training procedure, we additionally employ a fixed VGG-16 network and extract feature maps from predefined layers. Source and target face images, UV render maps were preliminarily resized to 256 x 256. UV space in SMPL format [3] was also discretized by 256 x 256 grid. All networks architectures are fully-convolutional and were mostly inspired by the model described in work on Gated Convolutions [8].

#### 1.1.1 Inpainting network

Architecture of the inpainting network is given in Table 1. There,  $\text{conv\_blk}N$ ,  $N = \overline{1, \dots, 15}$ , corresponds to one Gated convolution [8] followed by batch normalization with filters, stride and duration as specified in the second column of table 2;  $\text{conv}16$  corresponds to a plain convolution, and  $\text{upsample}N$ ,  $N = \overline{0, 1}$ , is a bilinear interpolation into a twice larger resolution. Inputs to all convolutions in the network were padded by reflection padding. We use a definition of Gated convolution originally proposed in [8]: this is a block of 2 convolutions with kernels  $W_g$  and  $W_f$ , applied to an input image  $I$  as follows and yielding output  $Out$  of gated convolution.

$$\text{Gating} = \text{conv}(I, W_g),$$

$$\text{Features} = \text{conv}(I, W_f),$$

$$\text{Out} = \phi(\text{Features}) \cdot \sigma(\text{Gating}),$$

where  $\phi$  is an activation (ELU was used in our system) and  $\sigma$  is the sigmoid function. Soft feature importance

masks *Gating* learn to ignore the provided gaps selectively and let intermediate convolutions in the network attend only relevant parts of an image.

| Layer              | Filters/<br>Stride<br>(Dilation) | Input                      | Input Size                                  | Output Size                                 |
|--------------------|----------------------------------|----------------------------|---------------------------------------------|---------------------------------------------|
| Inpainting network |                                  |                            |                                             |                                             |
| conv_blk1          | 5 x 5 / 1 (1)                    | $[C, C', \text{meshgrid}]$ | $5 \times H \times W$                       | $32 \times H \times W$                      |
| conv_blk2          | 3 x 3 / 2 (1)                    | conv_blk1                  | $32 \times H \times W$                      | $64 \times \frac{H}{2} \times \frac{W}{2}$  |
| conv_blk3          | 3 x 3 / 1 (1)                    | conv_blk2                  | $64 \times \frac{H}{2} \times \frac{W}{2}$  | $64 \times \frac{H}{2} \times \frac{W}{2}$  |
| conv_blk4          | 3 x 3 / 2 (1)                    | conv_blk3                  | $64 \times \frac{H}{2} \times \frac{W}{2}$  | $128 \times \frac{H}{4} \times \frac{W}{4}$ |
| conv_blk5          | 3 x 3 / 1 (1)                    | conv_blk4                  | $128 \times \frac{H}{4} \times \frac{W}{4}$ | $128 \times \frac{H}{4} \times \frac{W}{4}$ |
| conv_blk6          | 3 x 3 / 1 (1)                    | conv_blk5                  | $128 \times \frac{H}{4} \times \frac{W}{4}$ | $128 \times \frac{H}{4} \times \frac{W}{4}$ |
| conv_blk7          | 3 x 3 / 1 (2)                    | conv_blk6                  | $128 \times \frac{H}{4} \times \frac{W}{4}$ | $128 \times \frac{H}{4} \times \frac{W}{4}$ |
| conv_blk8          | 3 x 3 / 1 (4)                    | conv_blk7                  | $128 \times \frac{H}{4} \times \frac{W}{4}$ | $128 \times \frac{H}{4} \times \frac{W}{4}$ |
| conv_blk9          | 3 x 3 / 1 (8)                    | conv_blk8                  | $128 \times \frac{H}{4} \times \frac{W}{4}$ | $128 \times \frac{H}{4} \times \frac{W}{4}$ |
| conv_blk10         | 3 x 3 / 1 (8)                    | conv_blk9                  | $128 \times \frac{H}{4} \times \frac{W}{4}$ | $128 \times \frac{H}{4} \times \frac{W}{4}$ |
| conv_blk11         | 3 x 3 / 1 (1)                    | conv_blk10                 | $128 \times \frac{H}{4} \times \frac{W}{4}$ | $128 \times \frac{H}{4} \times \frac{W}{4}$ |
| conv_blk12         | 3 x 3 / 1 (1)                    | conv_blk11                 | $128 \times \frac{H}{4} \times \frac{W}{4}$ | $128 \times \frac{H}{4} \times \frac{W}{4}$ |
| upsample1          | —                                | conv_blk12                 | $128 \times \frac{H}{4} \times \frac{W}{4}$ | $128 \times \frac{H}{2} \times \frac{W}{2}$ |
| conv_blk13         | 3 x 3 / 1 (1)                    | upsample1                  | $128 \times \frac{H}{2} \times \frac{W}{2}$ | $64 \times \frac{H}{2} \times \frac{W}{2}$  |
| upsample2          | —                                | conv_blk13                 | $64 \times \frac{H}{2} \times \frac{W}{2}$  | $64 \times H \times W$                      |
| conv_blk14         | 3 x 3 / 1 (1)                    | upsample2                  | $64 \times H \times W$                      | $32 \times H \times W$                      |
| conv_blk15         | 3 x 3 / 1 (1)                    | conv_blk14                 | $32 \times H \times W$                      | $16 \times H \times W$                      |
| conv16             | 3 x 3 / 1 (1)                    | conv_blk15                 | $16 \times H \times W$                      | $2 \times H \times W$                       |
| tanh               | —                                | conv16                     | $2 \times H \times W$                       | $2 \times H \times W$                       |

Table 1. Architecture of the inpainting network. It is assumed that input tensor has a shape of  $5 \times H \times W$ , where 5 is a number of channels and  $H \times W$  is the spatial dimension (256 x 256 in this case).

#### 1.1.2 Refinement network

Refinement network consists of 4 parts: source encoder, target encoder, intermediate residual blocks and decoder. Their architectures are described in detail in Table 2 and Table 3.

Source encoder takes as input a concatenation of four

tensors in source space, namely: source RGB image  $S$ , source UV render  $M_s$ , source mask  $M'_s$  (with ones in all locations where UV render is defined and zeros in all others) and a meshgrid tensor. Target encoder is given tensors in target space: predicted image produced by reprojecting restored texture onto target UV render ( $N$ ), target UV render itself ( $M_N$ ), target mask ( $M'_N$ ) as well as inpainted xy coordinates reprojected onto target UV render ( $E$ ) and a meshgrid tensor.

Target encoder is followed by 6 residual blocks which inputs are added up to its' outputs. Outputs of the last residual block are passed into the decoder, that mirrors structure of each encoder.

Outputs of three target encoder layers (tgt\_blk2, tgt\_blk4, tgt\_blk6) and three source encoder layers (src\_blk2, src\_blk4, src\_blk6) are passed to their counterparts in the decoder (conv\_blk5, conv\_blk3 and conv\_blk1 respectively) via skip connections. Outputs of target decoder are passed without change while those of source encoder are priorly processed with  $warp(*, E, M'_N)$  operation. This function warps those pixels presented in target UV render with warp-field  $E$ , and the remaining ones with meshgrid tensor via spatial transformer. Each of the notations  $src\_blkN$ ,  $N = \overline{1, \dots, 3}$ ,  $tgt\_blkN$ ,  $N = \overline{1, \dots, 3}$ ,  $res\_blkN$ ,  $N = \overline{1, \dots, 6}$  corresponds to a block with plain Convolution (with SpectralNorm [5]), batch normalization and Leaky ReLU (slope = 0.01).

| Layer         | Filters/<br>Stride<br>(Dilation) | Input                                    | Input Size                             | Output Size                            |
|---------------|----------------------------------|------------------------------------------|----------------------------------------|----------------------------------------|
| Source branch |                                  |                                          |                                        |                                        |
| src_blk1      | 5 x 5 / 1 (1)                    | [ $S, M_s, M'_s$ ,<br>meshgrid]          | 8 x $H \times W$                       | 256 x $H \times W$                     |
| src_blk2      | 3 x 3 / 1 (1)                    | src_blk1                                 | 256 x $H \times W$                     | 256 x $H \times W$                     |
| src_blk3      | 3 x 3 / 2 (1)                    | src_blk2                                 | 256 x $H \times W$                     | 256 x $H \times W$                     |
| Target branch |                                  |                                          |                                        |                                        |
| tgt_blk1      | 5 x 5 / 1 (1)                    | [ $N, M_N$ ,<br>$M'_N, E$ ,<br>meshgrid] | 10 x $H \times W$                      | 256 x $H \times W$                     |
| tgt_blk2      | 3 x 3 / 2 (1)                    | tgt_blk1                                 | 256 x $H \times W$                     | 256 x $\frac{H}{2} \times \frac{W}{2}$ |
| tgt_blk3      | 3 x 3 / 2 (1)                    | tgt_blk2                                 | 256 x $\frac{H}{2} \times \frac{W}{2}$ | 256 x $\frac{H}{4} \times \frac{W}{4}$ |
| res_blk1      | 3 x 3 / 1 (1)                    | tgt_blk3                                 | 256 x $\frac{H}{4} \times \frac{W}{4}$ | 256 x $\frac{H}{4} \times \frac{W}{4}$ |
| res_blk2      | 3 x 3 / 1 (1)                    | [res_blk1 +<br>tgt_blk3]                 | 256 x $\frac{H}{4} \times \frac{W}{4}$ | 256 x $\frac{H}{4} \times \frac{W}{4}$ |
| res_blk3      | 3 x 3 / 1 (1)                    | [res_blk1 +<br>+ res_blk2]               | 256 x $\frac{H}{4} \times \frac{W}{4}$ | 256 x $\frac{H}{4} \times \frac{W}{4}$ |
| res_blk4      | 3 x 3 / 1 (1)                    | [res_blk2 +<br>+ res_blk3]               | 256 x $\frac{H}{4} \times \frac{W}{4}$ | 256 x $\frac{H}{4} \times \frac{W}{4}$ |
| res_blk5      | 3 x 3 / 1 (1)                    | [res_blk3 +<br>+ res_blk4]               | 256 x $\frac{H}{4} \times \frac{W}{4}$ | 256 x $\frac{H}{4} \times \frac{W}{4}$ |
| res_blk6      | 3 x 3 / 1 (1)                    | [res_blk4<br>+ res_blk5]                 | 256 x $\frac{H}{4} \times \frac{W}{4}$ | 256 x $\frac{H}{4} \times \frac{W}{4}$ |

Table 2. Architecture of the source and target branches of  $g$ .

|            |               |                                                                           |                                        |                                        |
|------------|---------------|---------------------------------------------------------------------------|----------------------------------------|----------------------------------------|
| Joint part |               |                                                                           |                                        |                                        |
| conv_blk1  | 3 x 3 / 1 (1) | [res_blk5<br>+ res_blk6,<br>warp(<br>src_blk3,<br>$E, E'$ )]<br>tgt_blk3] | 768 x $\frac{H}{4} \times \frac{W}{4}$ | 256 x $\frac{H}{4} \times \frac{W}{4}$ |
| upsample1  | —             | conv_blk2                                                                 | 256 x $\frac{H}{4} \times \frac{W}{4}$ | 256 x $\frac{H}{2} \times \frac{W}{2}$ |
| conv_blk2  | 3 x 3 / 1 (1) | [upsample1,<br>tgt_blk2,<br>warp(<br>src_blk2,<br>$E, E'$ )]              | 768 x $\frac{H}{2} \times \frac{W}{2}$ | 256 x $\frac{H}{2} \times \frac{W}{2}$ |
| upsample2  | —             | conv_blk4                                                                 | 256 x $\frac{H}{2} \times \frac{W}{2}$ | 256 x $H \times W$                     |
| conv_blk3  | 3 x 3 / 1 (1) | [upsample2,<br>tgt_blk1,<br>warp(<br>src_blk1,<br>$E, E'$ )]              | 768 x $H \times W$                     | 256 x $H \times W$                     |
| conv4      | 3 x 3 / 1 (1) | conv_blk5                                                                 | 256 x $H \times W$                     | 3 x $H \times W$                       |
| sigmoid    | —             | conv_blk3                                                                 | 3 x $H \times W$                       | 3 x $H \times W$                       |

Table 3. Architecture of the joint part of the refinement network  $g$ , which accepts output of source and target branch and merges them into a final output.

### 1.1.3 Patch discriminator

To enhance photorealism of resulting images, we adopt Patch discriminator introduced in [9]. It uses a stack of convolutional layers to map input images into 1-channel tensor, where each element tells to which extent a certain image segment is considered real. We use LS-GAN [4] modification for this discriminator, so its' outputs are in range from 0 to 1 and losses are computed as follows:

$$\begin{aligned}
L_d^{real}(N) &= \|1 - d(N)\|_2 \\
L_d^{fake}(g, \hat{N}) &= \|d(g(\hat{N}))\|_2 \\
L_g^{fake}(g, \hat{N}) &= \|1 - d(g(\hat{N}))\|_2,
\end{aligned}$$

where  $L_d^{real}$  and  $L_d^{fake}$  are losses for discriminator on real and fake samples respectively,  $L_g^{fake}$  is a generator loss for each generated (fake) sample,  $g$  and  $d$  are generator and discriminator functions.

To condition Patch discriminator on human pose we pass RGB images (real or fake) concatenated with corresponding UV renders into it.

Architecture of Patch discriminator is reported in Table 4. There,  $sn\_conv\_blkN$ ,  $N = \overline{1, \dots, 5}$ , corresponds to one plain Convolution (with SpectralNorm [5]), batch normalization and Leaky ReLU (slope = 0.2).

| Patch discriminator |                                  |              |                                       |                                       |
|---------------------|----------------------------------|--------------|---------------------------------------|---------------------------------------|
| Layer               | Filters/<br>Stride<br>(Dilation) | Input        | Input Size                            | Output Size                           |
| sn_conv_blk1        | 4 x 4 / 2 (1)                    | $N, M_N$     | 5 x $H$ x $W$                         | 16 x $\frac{H}{2}$ x $\frac{W}{2}$    |
| sn_conv_blk2        | 4 x 4 / 2 (1)                    | sn_conv_blk1 | 16 x $\frac{H}{2}$ x $\frac{W}{2}$    | 32 x $\frac{H}{4}$ x $\frac{W}{4}$    |
| sn_conv_blk3        | 4 x 4 / 2 (1)                    | sn_conv_blk2 | 32 x $\frac{H}{4}$ x $\frac{W}{4}$    | 64 x $\frac{H}{8}$ x $\frac{W}{8}$    |
| sn_conv_blk4        | 4 x 4 / 2 (1)                    | sn_conv_blk3 | 64 x $\frac{H}{8}$ x $\frac{W}{8}$    | 128 x $\frac{H}{16}$ x $\frac{W}{16}$ |
| sn_conv_blk5        | 4 x 4 / 1 (1)                    | sn_conv_blk4 | 128 x $\frac{H}{16}$ x $\frac{W}{16}$ | 1 x $\frac{H}{16}$ x $\frac{W}{16}$   |
| sigmoid             | —                                | sn_conv_blk5 | 1 x $\frac{H}{16}$ x $\frac{W}{16}$   | 1 x $\frac{H}{16}$ x $\frac{W}{16}$   |

Table 4. Architecture of the patch discriminator  $p$ .

### 1.1.4 Loss functions

Our model is trained with a loss function comprised of four elements.

**NN loss** is a loss function presented in [7] which operates on outputs of *relu1\_2* layer of VGG19 net  $relu1_2(N)$  and  $relu1_2(\hat{N})$ . It traverses all local positions in  $relu1_2(\hat{N})$  and sums up distances to the most similar feature in the corresponding  $3 \times 3$  window of  $relu1_2(N)$ .

**Content loss** is a distance between features of a refined output image  $\hat{N}$  and target view image  $N$  extracted from several layers of a fixed VGG-16 network pretrained on ImageNet. Let  $L \in \{\text{relu1\_2}, \text{relu2\_2}, \text{relu3\_3}, \text{relu4\_3}\}$  be a function which accepts an image and yields a flattened vector of features of this image extracted from a respective layer of a pretrained network.

$$\begin{aligned}
L_{content}(\hat{N}, N) = & \frac{1}{8} \|\text{relu1\_2}(\hat{N}) - \text{relu1\_2}(N)\|_2 + \\
& \frac{1}{4} \|\text{relu2\_2}(\hat{N}) - \text{relu2\_2}(N)\|_2 + \\
& \frac{1}{2} \|\text{relu3\_3}(\hat{N}) - \text{relu3\_3}(N)\|_2 + \\
& \|\text{relu4\_3}(\hat{N}) - \text{relu4\_3}(N)\|_2
\end{aligned}$$

**Style loss** is a distance between Gram matrices of a refined output image  $\hat{N}$  and target view image  $N$  extracted from several layers of a fixed VGG-16 network pretrained on ImageNet. Reusing the notation above, style loss is defined as follows:

| Loss                | Weight |
|---------------------|--------|
| NN                  | 5e-1   |
| Content loss        | 1e-1   |
| Style loss          | 1e+5   |
| Discriminator loss  | 1      |
| Identity loss       | 1e+1   |
| Texture source loss | 1e+1   |
| Texture target loss | 1e+1   |

Table 5. Weights for each part of the loss function.

$$\begin{aligned}
L_{style}(\hat{N}, N) = & \frac{1}{32} \left\| \frac{1}{L_1} \sum_{i,j} G_{ij}(\text{relu1\_2}(\hat{N})) - \frac{1}{L_1} \sum_{i,j} G_{ij}(\text{relu1\_2}(N)) \right\|_2 + \\
& \frac{1}{16} \left\| \frac{1}{L_2} \sum_{i,j} G_{ij}(\text{relu2\_2}(\hat{N})) - \frac{1}{L_2} \sum_{i,j} G_{ij}(\text{relu2\_2}(N)) \right\|_2 + \\
& \frac{1}{8} \left\| \frac{1}{L_3} \sum_{i,j} G_{ij}(\text{relu3\_3}(\hat{N})) - \frac{1}{L_3} \sum_{i,j} G_{ij}(\text{relu3\_3}(N)) \right\|_2 + \\
& \frac{1}{4} \left\| \frac{1}{L_4} \sum_{i,j} G_{ij}(\text{relu4\_3}(\hat{N})) - \frac{1}{L_4} \sum_{i,j} G_{ij}(\text{relu4\_3}(N)) \right\|_2
\end{aligned}$$

where  $G_{ij}(L(A))$  is a Gram matrix built upon a set of flattened feature maps  $L(A)$  of an image  $A$ , and  $L_k$  is a number of elements in the Gram matrix in the  $k$ -th term.

**Discriminator loss**  $L_g^{fake}$  is calculated using Patch GAN and is described above in Section 1.1.3.

**Identity loss** is a distance between a source texture  $C$  and an inpainted texture  $W$ , calculated only over visible pixels:

$$L_{id} = \frac{\sum_{i,j} |C'_{ij} \cdot (C_{ij} - W_{ij})|}{\sum_{i,j} |C'_{ij}|}$$

**Texture source loss** is a  $L_1$  distance between the person texture in source view and output of  $f$  calculated over those texels visible in source view.

**Texture target loss** is a  $L_1$  distance between the person texture in target view and output of  $f$  calculated over those texels visible in target view.

During the first stage, that is, training inpainter network  $f$ , all the loss functions, except for adversarial loss, are used with weights listed in Table 5. At the second stage adversarial loss is introduced, while losses that operate on texture space (Identity loss, Texture source loss, Texture target loss) are zeroed out.

## 1.2. Ablation study

We use four different models trained in same conditions (i.e. same number of iterations, same loss functions and

same test/train splits) for ablation study.

*Ours-Full* is a full model that uses all components described in 1.1.

In *Ours-NoDeform* source encoder of refinement network and thus deformable skip connections are omitted. Here source image, source UV render and source mask are passed into target encoder along with its' other inputs.

*RGB inpainting* also omits source encoder and replaces coordinate-based inpainting with regular RGB inpainting.

In *Baseline* the whole texture inpainting procedure is omitted as well as inpainter network. Source image, along with source/target UV renders and source/target masks, are passed into target encoder of refinement network to produce reconstructions.

See the visual results of ablation study in Figure 2.

## 2. Face resynthesis

### 2.1. Architectures

For face resynthesis we were using exactly the same architectures as in full body resynthesis (see Subsection 1.1). Source and target face images, UV render maps were preliminarily resized to 128 x 128 resolution. UV space provided by PRNet [2] was also discretized by 128 x 128 grid.

The experiment was conducted as a case study. See the ablation study in the paper text and the additional visualizations in supplementary video.

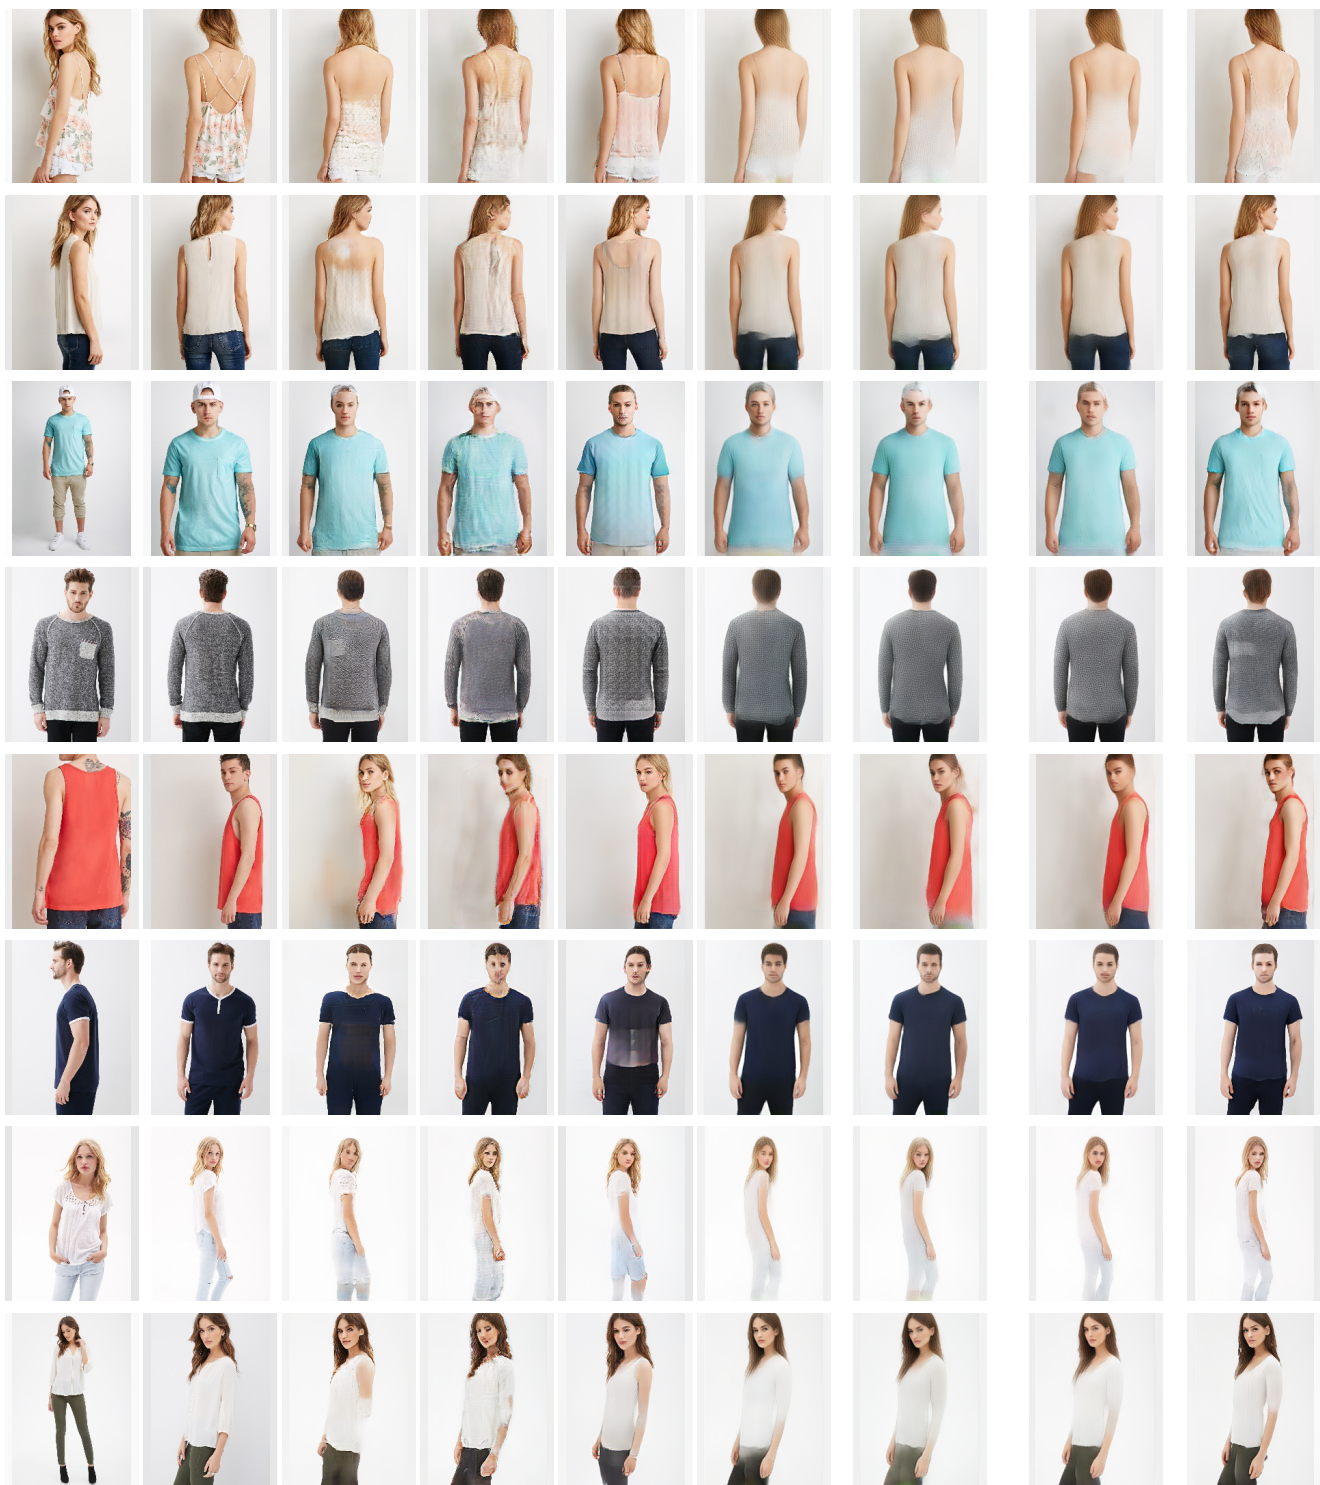

SRC

GT

DSC[7]

DPT[6]

VUnet[1]

No textures

RGB inpainting

Ours-NoDeform

Ours-Full

Figure 1. Visual results of ablation study and comparison with state-of-the-art methods

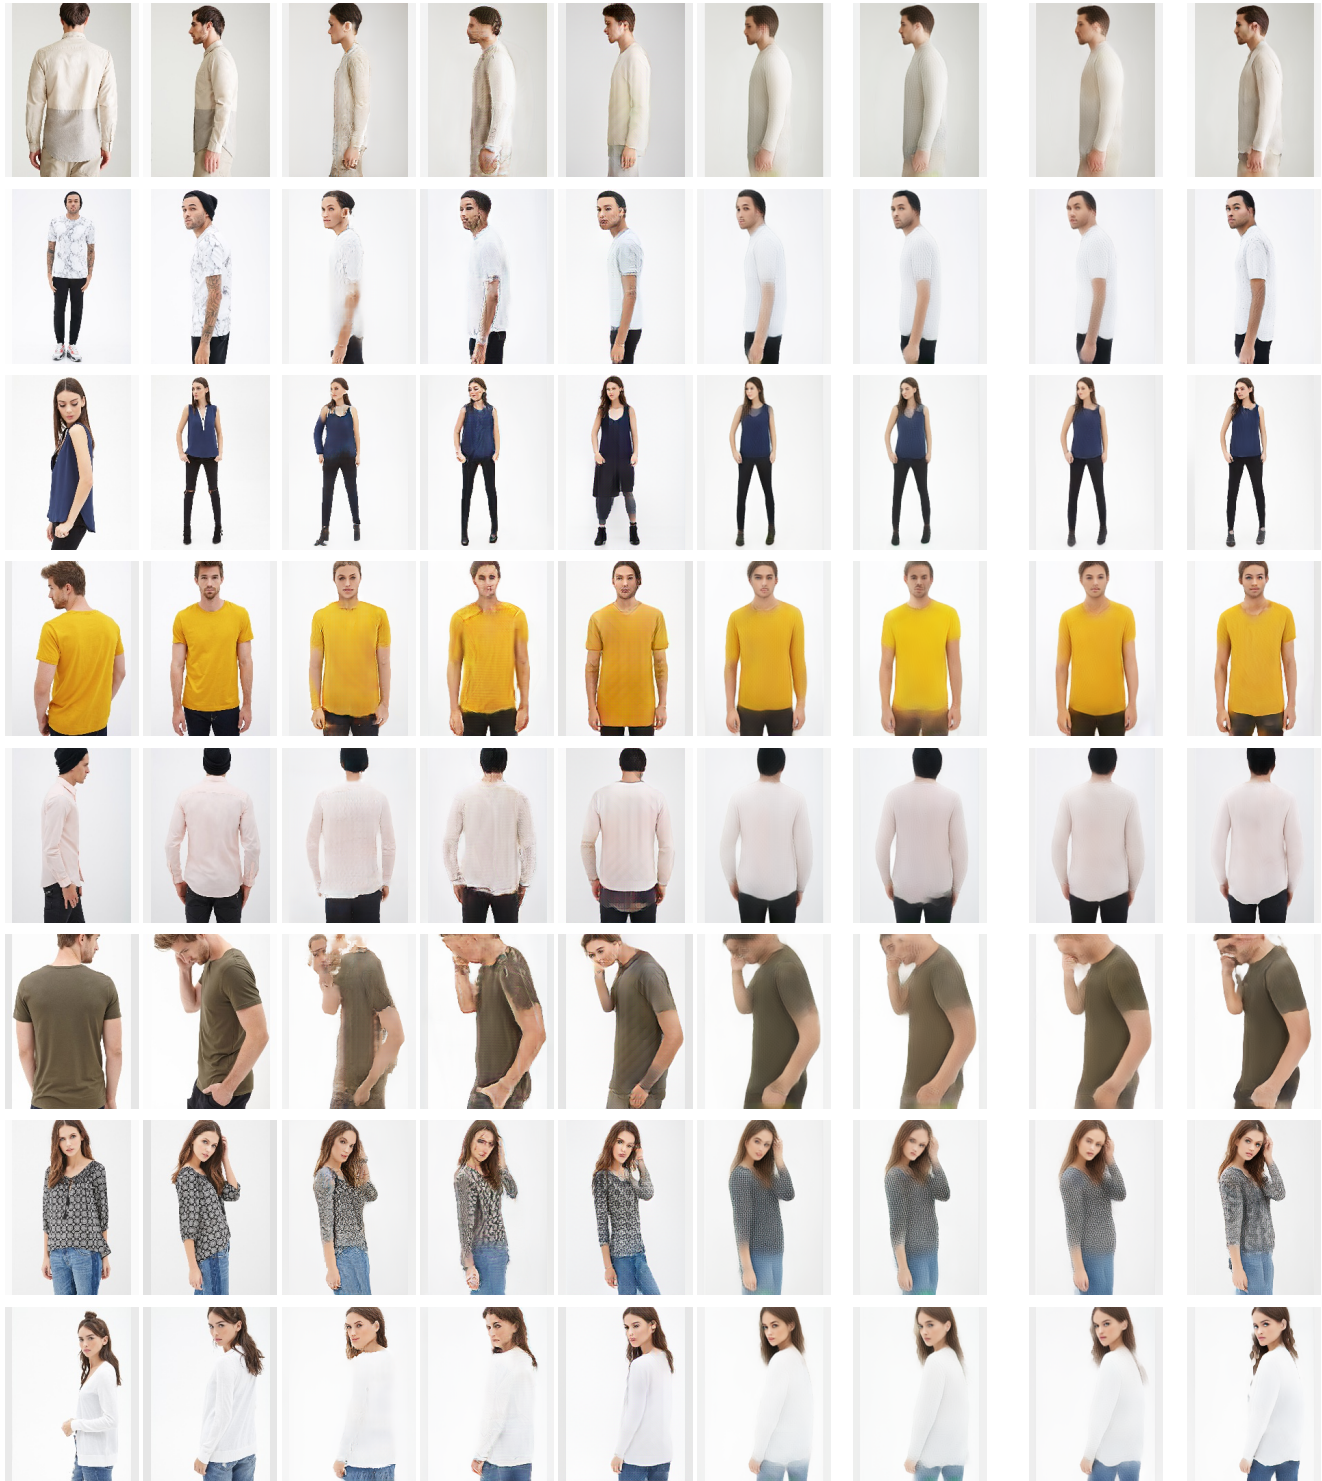

SRC

GT

DSC[7]

DPT[6]

VUnet[1]

No textures

RGB inpainting

Ours-NoDeform

Ours-Full

Figure 2. More visual results of ablation study

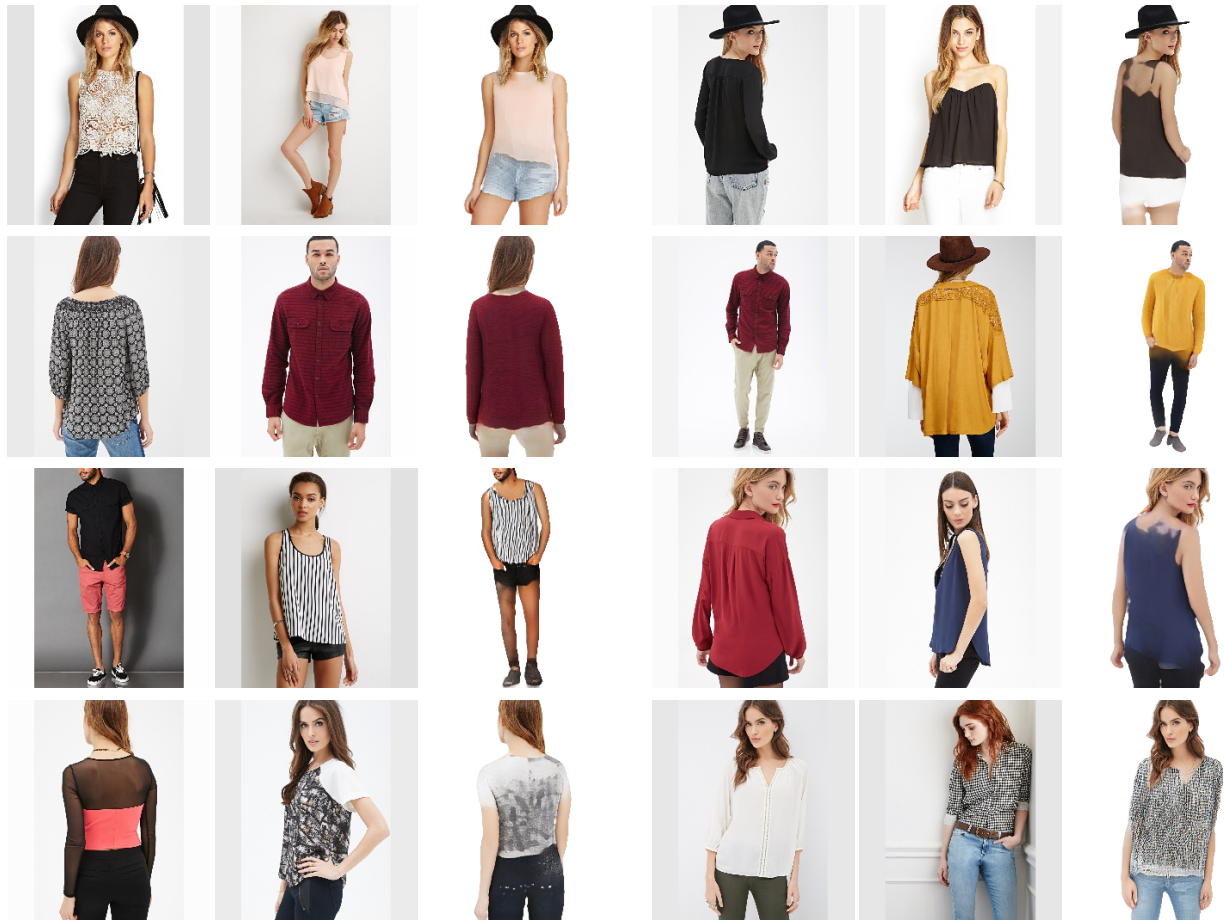

Source person

Source clothing

Redressed

Source person

Source clothing

Redressed

Figure 3. Additional examples of garment transfer procedure obtained using a simple modification of our approach. In each triplet, the third image shows the person from the first image dressed into the clothes from the second image.

## References

- [1] Patrick Esser, Ekaterina Sutter, and Björn Ommer. A variational u-net for conditional appearance and shape generation. In *The IEEE Conference on Computer Vision and Pattern Recognition (CVPR)*, June 2018. 5, 6
- [2] Yao Feng, Fan Wu, Xiaohu Shao, Yanfeng Wang, and Xi Zhou. Joint 3d face reconstruction and dense alignment with position map regression network. In *ECCV*, 2018. 4
- [3] Matthew Loper, Naureen Mahmood, Javier Romero, Gerard Pons-Moll, and Michael J Black. Smpl: A skinned multi-person linear model. *ACM Transactions on Graphics (TOG)*, 34(6):248, 2015. 1
- [4] Xudong Mao, Qing Li, Haoran Xie, Raymond YK Lau, Zhen Wang, and Stephen Paul Smolley. Least squares generative adversarial networks. In *Computer Vision (ICCV), 2017 IEEE International Conference on*, pages 2813–2821. IEEE, 2017. 2
- [5] Takeru Miyato, Toshiki Kataoka, Masanori Koyama, and Yuichi Yoshida. Spectral normalization for generative adversarial networks. *arXiv preprint arXiv:1802.05957*, 2018. 2
- [6] Natalia Neverova, Riza Alp Güler, and Iasonas Kokkinos. Dense pose transfer. In *The European Conference on Computer Vision (ECCV)*, September 2018. 5, 6
- [7] Aliaksandr Siarohin, Enver Sangineto, Stéphane Lathuillière, and Nicu Sebe. Deformable gans for pose-based human image generation. In *The IEEE Conference on Computer Vision and Pattern Recognition (CVPR)*, June 2018. 3, 5, 6
- [8] Jiahui Yu, Zhe Lin, Jimei Yang, Xiaohui Shen, Xin Lu, and Thomas S Huang. Free-form image inpainting with gated convolution. *arXiv preprint arXiv:1806.03589*. 1
- [9] Jun-Yan Zhu, Taesung Park, Phillip Isola, and Alexei A Efros. Unpaired image-to-image translation using cycle-consistent adversarial networks. *arXiv preprint*, 2017. 2
